# Supplementary material for: The human Holliday junction resolvase GEN1 rescues the meiotic phenotype of a Schizosaccharomyces pombe mus81 mutant
Source: PubMed Central journal article supplement — Nucleic Acids Res. 2009 Dec 29;38(6):1866–73. doi: 10.1093/nar/gkp1179 (PMC2847240; doi:10.1093/nar/gkp1179), 2009-12-29
Supplement: gkp1179_1.pdf [file gkp1179_1.pdf]

## **SUPPLEMENTARY DATA**

### **The human Holliday junction resolvase GEN1 rescues the meiotic phenotype of a *S. pombe mus81* mutant**

**Alexander LORENZ<sup>1</sup>, Stephen C. WEST<sup>2</sup> & Matthew C. WHITBY<sup>1,\*</sup>**

<sup>1</sup>Department of Biochemistry, University of Oxford, South Parks Road, Oxford OX1 3QU, UK

<sup>2</sup>Cancer Research UK, London Research Institute, Clare Hall Laboratories, South Mimms, Hertfordshire EN6 3LD, UK

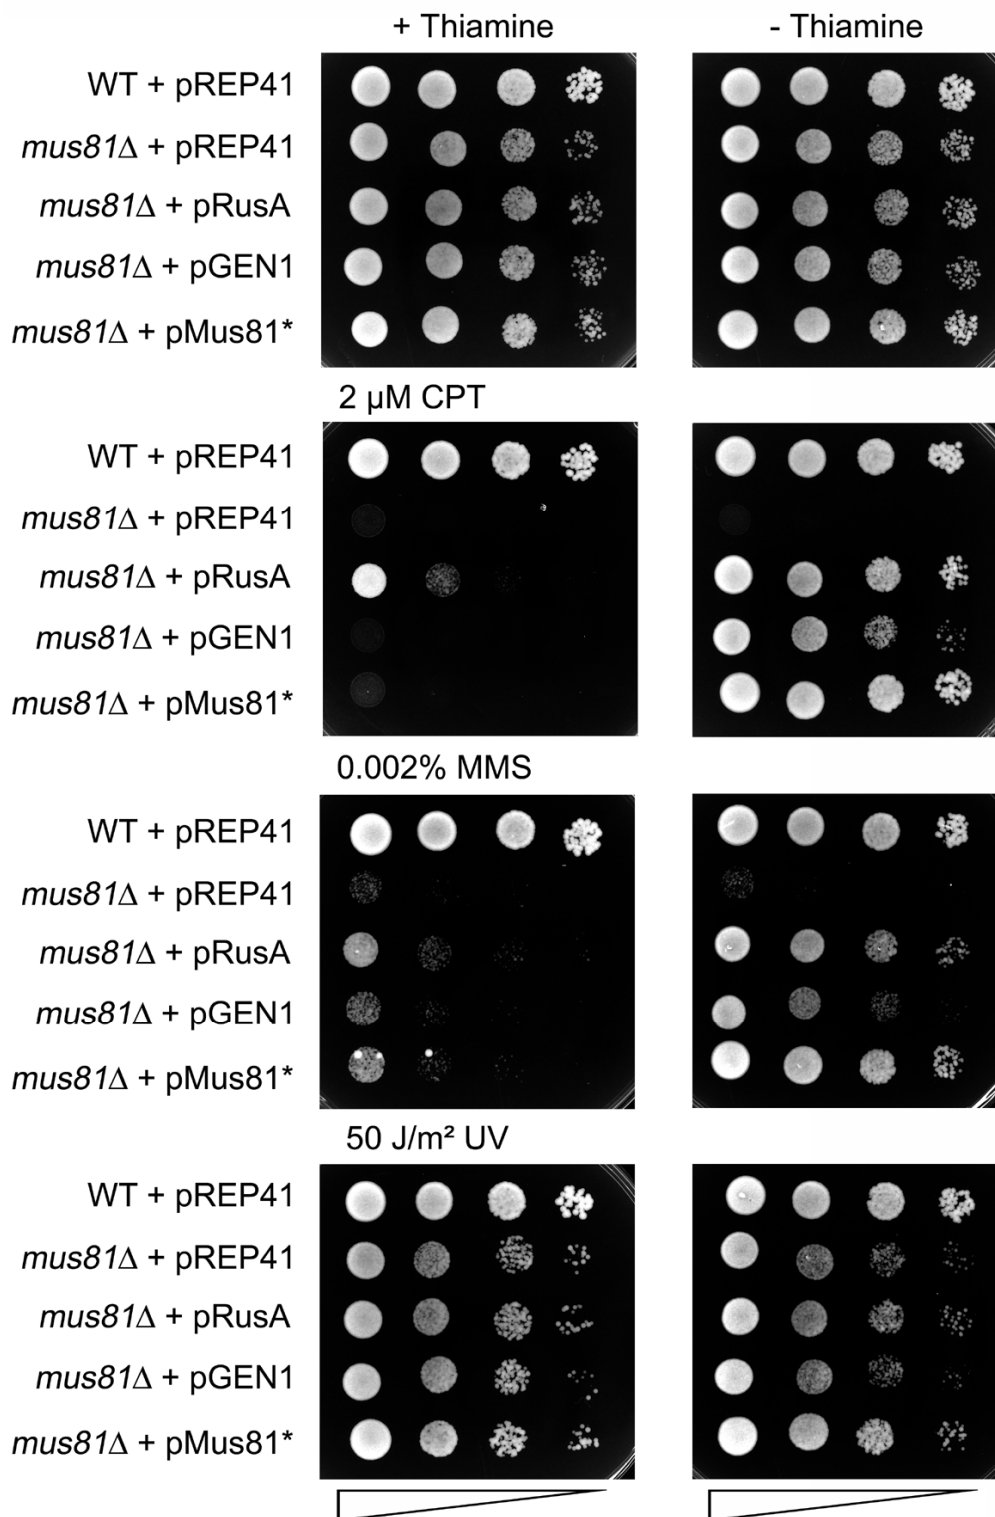

**Figure S1.** Effect of RusA (expressed from the thiamine-repressible *nmt1*-promotor in pREP1), GEN1 and Mus81-Eme1 (expressed from the thiamine-repressible *nmt1*-promotor in pREP41) on genotoxin sensitivities of a *mus81Δ* (MCW1238) strain. The empty vector pREP41 in the wild-type strain MCW1221 and in MCW1238 serve as controls. The neat spot represents  $10^5$  cells.

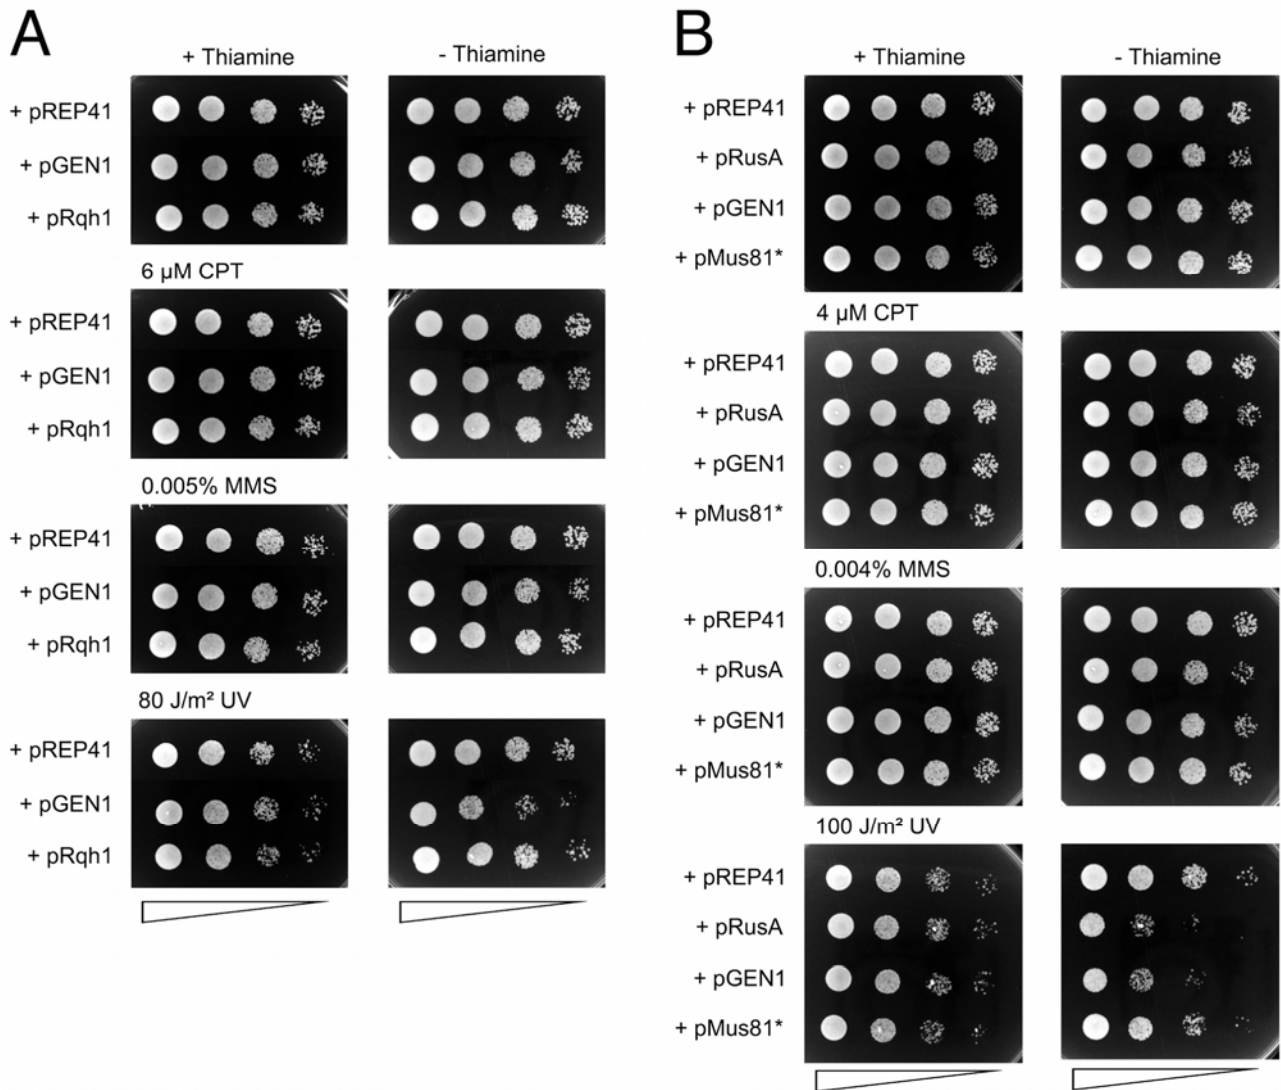

**Figure S2.** Effect of (A) GEN1 and Rqh1 (expressed from the thiamine-repressible *ntm1*-promotor in pREP41) and (B) RusA (expressed from the thiamine-repressible *ntm1*-promotor in pREP1), GEN1 and Mus81-Eme1 (expressed from the thiamine-repressible *ntm1*-promotor in pREP41) on genotoxin sensitivities of a wild-type strain (MCW1221). pREP41 serves as the empty vector control. The neat spot represents  $10^5$  cells.

**Table S1.** Spore viability of crosses of wild-type strains (MCW1221 × FO808) transformed with the plasmid pREP41 and *mus81Δ* strains (MCW1238 × MCW1237) transformed with the plasmids pREP41, pMus81\*, pRusA, pGEN1, pGEN1<sup>EA/EA</sup> and pGEN1<sup>DA</sup> (see also Figure 4).

| strain        | plasmid                | spore viability in % of plated spores, numbers in brackets are spores plated/experiment <sup>a</sup> |                  |                  |                  |                  | Mean ± s.d. <sup>a</sup> |
|---------------|------------------------|------------------------------------------------------------------------------------------------------|------------------|------------------|------------------|------------------|--------------------------|
| WT            | pREP41                 | 47.57<br>(885)                                                                                       | 58.62<br>(911)   | 59.66<br>(870)   | 64.65<br>(843)   | 83.50<br>(921)   | 62.80 ± 13.15<br>(4,430) |
| <i>mus81Δ</i> | pREP41                 | 0.80<br>(19,800)                                                                                     | 0.84<br>(14,700) | 1.08<br>(16,380) | 1.20<br>(16,200) | 3.98<br>(33,000) | 1.58 ± 1.35<br>(100,080) |
| <i>mus81Δ</i> | pMus81*                | 22.61<br>(1,362)                                                                                     | 29.71<br>(912)   | 36.86<br>(1,050) | 46.55<br>(885)   | 52.92<br>(924)   | 37.73 ± 12.27<br>(5,133) |
| <i>mus81Δ</i> | pRusA                  | 23.04<br>(1,376)                                                                                     | 25.17<br>(1,029) | 25.53<br>(1,332) | 30.45<br>(972)   | 34.17<br>(954)   | 27.67 ± 4.54<br>(5,663)  |
| <i>mus81Δ</i> | pGEN1                  | 40.26<br>(1,950)                                                                                     | 42.14<br>(1,170) | 46.77<br>(789)   | 47.52<br>(1,128) | 49.91<br>(1,080) | 45.32 ± 3.99<br>(6,117)  |
| <i>mus81Δ</i> | pGEN1 <sup>EA/EA</sup> | 1.26<br>(12,900)                                                                                     | 1.56<br>(13,950) | 1.61<br>(16,200) | 1.69<br>(12,825) | 3.67<br>(15,000) | 1.96 ± 0.97<br>(70,875)  |
| <i>mus81Δ</i> | pGEN1 <sup>DA</sup>    | 0.88<br>(9,750)                                                                                      | 0.94<br>(8,100)  | 1.21<br>(14,550) | 1.73<br>(9,000)  | 2.05<br>(9,180)  | 1.36 ± 0.51<br>(50,580)  |

<sup>a</sup> numbers in brackets represent total number of plated spores (n).

**Table S2.** Frequency of gene conversion and crossing over in the *ura4-aim2 – ade6 – his3-aim* interval. The values are the means from *n* independent crosses, the values in brackets are the standard deviations. The number of *ade*<sup>+</sup> recombinants tested is indicated, as is the total number of viable spores analyzed for crossing over between *ura4-aim2* and *his3-aim*. *ade6-3083* is a known hot spot for recombination and therefore acts predominantly as a recipient of genetic information, which explains the disparity between R1 and R2 classes. CentiMorgan (cM) are calculated from the accumulated data of the independent crosses, not from the mean values.

| Cross                   |                                        |          | % <i>ade</i> <sup>+</sup>                 |                                |                                                      |                                                      | Crossovers (CO)                                      |                                                      |        | cM                           |                      |
|-------------------------|----------------------------------------|----------|-------------------------------------------|--------------------------------|------------------------------------------------------|------------------------------------------------------|------------------------------------------------------|------------------------------------------------------|--------|------------------------------|----------------------|
| strain                  | genotype                               | <i>n</i> | Frequency of <i>ade</i> <sup>+</sup> in % | <i>ade</i> <sup>+</sup> tested | <i>ura</i> <sup>+</sup> <i>his</i> <sup>+</sup> (P1) | <i>ura</i> <sup>+</sup> <i>his</i> <sup>-</sup> (P2) | <i>ura</i> <sup>-</sup> <i>his</i> <sup>-</sup> (R1) | <i>ura</i> <sup>-</sup> <i>his</i> <sup>+</sup> (R2) | tested |                              | Frequency of CO in % |
| MCW3202<br>×<br>MCW3200 | wild type                              | 10       | 0.906<br>(0.248)                          | 1,455                          | 4.64<br>(4.53)                                       | 38.54<br>(8.29)                                      | 54.99<br>(5.52)                                      | 1.83<br>(1.69)                                       | 1,647  | 8.58<br>(1.77)               | 9.76                 |
| MCW3514<br>×<br>MCW3589 | <i>mus81Δ</i>                          | 10       | 0.227 <sup>a</sup><br>(0.085)             | 46                             | 2.00 <sup>b</sup><br>(6.32)                          | 94.89 <sup>b</sup><br>(11.10)                        | 0 <sup>b</sup>                                       | 3.11 <sup>b</sup><br>(9.85)                          | 1,115  | 1.93 <sup>c</sup><br>(1.40)  | 2.06                 |
| MCW3202<br>×<br>FO1267  | wild type +<br>pREP41                  | 12       | 0.803<br>(0.098)                          | 2,247                          | 2.79<br>(1.17)                                       | 36.02<br>(4.11)                                      | 58.29<br>(3.86)                                      | 2.89<br>(2.09)                                       | 2,374  | 13.63<br>(4.95)              | 15.82                |
| MCW3514<br>×<br>FO1260  | <i>mus81Δ</i> +<br>pMus81 <sup>+</sup> | 10       | 0.980 <sup>d</sup><br>(0.216)             | 1,445                          | 3.26 <sup>e</sup><br>(1.14)                          | 39.33 <sup>e</sup><br>(6.90)                         | 53.57 <sup>e</sup><br>(7.22)                         | 3.84 <sup>e</sup><br>(2.24)                          | 1,504  | 12.99 <sup>f</sup><br>(3.38) | 15.91                |
| MCW3514<br>×<br>FO1260  | <i>mus81Δ</i> +<br>pRusA               | 13       | 0.836 <sup>g</sup><br>(0.295)             | 2,047                          | 8.78 <sup>h</sup><br>(4.12)                          | 49.36 <sup>h</sup><br>(7.21)                         | 29.90 <sup>h</sup><br>(7.24)                         | 11.96 <sup>h</sup><br>(6.92)                         | 2,088  | 11.89 <sup>i</sup><br>(4.31) | 12.75                |
| MCW3514<br>×<br>FO1260  | <i>mus81Δ</i> +<br>pGEN1               | 12       | 0.744 <sup>j</sup><br>(0.137)             | 2,054                          | 4.15 <sup>k</sup><br>(1.50)                          | 53.59 <sup>k</sup><br>(4.72)                         | 36.18 <sup>k</sup><br>(6.29)                         | 6.08 <sup>k</sup><br>(2.36)                          | 2,683  | 10.61 <sup>l</sup><br>(5.95) | 10.73                |

<sup>a</sup>  $p = 5.05 \times 10^{-6}$ ; two-tailed, heteroskedastic t-test against the data from the wild-type cross MCW3202 × MCW3200; highly significant.

<sup>b</sup>  $p = 1.89 \times 10^{-5}$ ; two-sample Kolmogorov-Smirnov test against the data from the wild-type cross MCW3202 × MCW3200; highly significant.

<sup>c</sup>  $p = 2.59 \times 10^{-8}$ ; two-tailed, homoskedastic t-test against the data from the wild-type cross MCW3202 × MCW3200; highly significant.

<sup>d</sup>  $p = 0.03$ ; two-tailed, heteroskedastic t-test against the data from the wild-type cross MCW3202 × FO1267 + pREP41; not significant.

<sup>e</sup>  $p = 0.12$ ; two-tailed, homoskedastic t-test against the data from the wild-type cross MCW3202 × FO1267 + pREP41; not significant.

<sup>f</sup>  $p = 0.73$ ; two-tailed, homoskedastic t-test against the data from the wild-type cross MCW3202 × FO1267 + pREP41; not significant.

<sup>g</sup>  $p = 0.72$ ; two-tailed, heteroskedastic t-test against the data from the wild-type cross MCW3202 × FO1267 + pREP41; not significant.

<sup>h</sup>  $p = 7.82 \times 10^{-11}$ ; two-tailed, homoskedastic t-test against the data from the wild-type cross MCW3202 × FO1267 + pREP41; highly significant.

<sup>i</sup>  $p = 0.36$ ; two-tailed, homoskedastic t-test against the data from the wild-type cross MCW3202 × FO1267 + pREP41; not significant.

<sup>j</sup>  $p = 0.24$ ; two-tailed, homoskedastic t-test against the data from the wild-type cross MCW3202 × FO1267 + pREP41; not significant.

<sup>k</sup>  $p = 1.73 \times 10^{-9}$ ; two-tailed, homoskedastic t-test against the data from the wild-type cross MCW3202 × FO1267 + pREP41; highly significant.

<sup>l</sup>  $p = 0.19$ ; two-tailed, homoskedastic t-test against the data from the wild-type cross MCW3202 × FO1267 + pREP41; not significant.
